# Supplementary material
Source: PubMed Central journal article supplement (PMC7962668)
Supplement: NIHMS1676524-supplement-Supplemental_material_ESM_13.pdf [file NIHMS1676524-supplement-Supplemental_material_ESM_13.pdf]

## Supplemental Material ESM\_14

### ESM\_14\_1. List of demographical, clinical and biochemical characteristics of the included postmortem human subjects

| Subject | Diagnosis | Age | PMI (h) | Agonal factor score | Brain pH | RIN  |
|---------|-----------|-----|---------|---------------------|----------|------|
| 2292    | Control   | 55  | 18.00   | 0                   | 6.83     | 6.6  |
| 2861    | Control   | 60  | 24.00   | 0                   | 6.99     | 6.7  |
| 2311    | Bipolar   | 23  | 9.00    | 0                   | 7.12     | 7.4  |
| 3927    | Bipolar   | 36  | 25.50   | 0                   | 6.69     | 7.05 |

### ESM\_14\_2. Probe sequences

Probe sequences (5' to 3', designed in our lab) for the target mRNAs whose expression has been shown in the current study, are listed below.

#### 1. Split-initiator probes for Figures 1, 2, 3c, 8, ESM\_13\_1 and ESM\_13\_5

Organism: Mouse (*Mus musculus*); Target mRNA: **Somatostatin (Sst)**; HCR amplifier: B3-AlexaFluor647, B3-AlexaFluor594

| Odd # | 1st half of Initiator I1 + Spacer | Probe Sequence            | Even # | Probe Sequence             | Spacer + 2nd half of Initiator I1 |
|-------|-----------------------------------|---------------------------|--------|----------------------------|-----------------------------------|
| 1     | gTCCCTgCCTCTATATCTTT              | TTCGGTAGCGTCTCCTTCAGCCGCT | 2      | CGCAGGTCCTCAGGCAGCAGCGACG  | TTCCAACCTTTAACCg                  |
| 3     | gTCCCTgCCTCTATATCTTT              | CTGGAGCGCGGTGGGTCACTAGT   | 4      | GTCATCTTCCTTGCCTCAGGCAGCCA | TTCCAACCTTTAACCg                  |
| 5     | gTCCCTgCCTCTATATCTTT              | AGGGCGCACTGGAGACGGCAGGACA | 6      | AAAGCCAGGACGATGCAGAGCGCAG  | TTCCAACCTTTAACCg                  |
| 7     | gTCCCTgCCTCTATATCTTT              | TCCCGGTGGCAGCCGCCAGAGACTT | 8      | CCAAGAAGTACTTGGCCAGTTCCTG  | TTCCAACCTTTAACCg                  |
| 9     | gTCCCTgCCTCTATATCTTT              | TGGTTGGGCTCGGACAGCAGCTCTG | 10     | TCGGGCTCCAGGGCATCATTCTCTG  | TTCCAACCTTTAACCg                  |
| 11    | gTCCCTgCCTCTATATCTTT              | GTGAATGTCTCCAGAAGAAGTTCT  | 12     | GGACAACAATATTAAGCTAACAGG   | TTCCAACCTTTAACCg                  |

## 2. Split-initiator probes for Figure 5

Organism: Mouse (*Mus musculus*); Target mRNA: **solute carrier family 17 member 7 (*Slc17a7/Vglut1*)**; HCR amplifier: B3-AlexaFluor647

| Odd # | 1st half of Initiator I1 + Spacer | Probe Sequence            | Even # | Probe Sequence            | Spacer + 2nd half of Initiator I1 |
|-------|-----------------------------------|---------------------------|--------|---------------------------|-----------------------------------|
| 1     | gTCCCTgCCTCTATATCTTT              | ACTGCCCCACAGTGGGAGGCCCGTG | 2      | GAGGTGTATGGAGTGGAAGTCCTGG | TTCCACTCAACTTTAACCCg              |
| 3     | gTCCCTgCCTCTATATCTTT              | TGGGAACAAGGGAGGACTTGCATCT | 4      | AGGGAAAGAGGGCTGGTCGGACAGC | TTCCACTCAACTTTAACCCg              |
| 5     | gTCCCTgCCTCTATATCTTT              | TCACCCCCGCAGGAGGCCAGTTGAG | 6      | TATCCTTGAACTGCTAGTGTGCAG  | TTCCACTCAACTTTAACCCg              |
| 7     | gTCCCTgCCTCTATATCTTT              | TTAGGCGAGCCTTGAACTAATAGA  | 8      | AACCAGCTTGAAAAATGTAGAATT  | TTCCACTCAACTTTAACCCg              |
| 9     | gTCCCTgCCTCTATATCTTT              | AACGGCGGCATTGGTGGTTAGGTTA | 10     | GAAACGCTGGTGAGAATCAGTCTGT | TTCCACTCAACTTTAACCCg              |
| 11    | gTCCCTgCCTCTATATCTTT              | GCCCGGCAAAGTGTGCTGGTGAGGG | 12     | CAATGATTGTACTAAGCTAAGGTCA | TTCCACTCAACTTTAACCCg              |
| 13    | gTCCCTgCCTCTATATCTTT              | AGCCACTACTGAGACCTGAAAAGT  | 14     | CGAGCCGCTGAATTAATAGCTTTGG | TTCCACTCAACTTTAACCCg              |
| 15    | gTCCCTgCCTCTATATCTTT              | GACACACAACAAATGGCCACTGAGA | 16     | AGATTTGGAATCATTTAGCCCCTGA | TTCCACTCAACTTTAACCCg              |
| 17    | gTCCCTgCCTCTATATCTTT              | TGTAACTTCTCTCACACACCTCACC | 18     | CCAGCCCCGCTCCCTTCTCTGGGAT | TTCCACTCAACTTTAACCCg              |
| 19    | gTCCCTgCCTCTATATCTTT              | CTGCCCCAGGAACAACCTCTCCTC  | 20     | CACAGAGACAGACACCAAGACACGA | TTCCACTCAACTTTAACCCg              |

## 3. Split-initiator probes for Figure ESM\_13\_1

Organism: Mouse (*Mus musculus*); Target mRNA: **glutamate decarboxylase 1 (*Gad 67/Gad 1*)**; HCR amplifier: B2-AlexaFluor488

| Odd # | 1st half of Initiator I1 + Spacer | Probe Sequence             | Even # | Probe Sequence             | Spacer + 2nd half of Initiator I1 |
|-------|-----------------------------------|----------------------------|--------|----------------------------|-----------------------------------|
| 1     | CCTCgTAAATCCTCATCAAA              | TATAAATAAGCAGATATCTCACTGA  | 2      | GTCTCTTTAACATGGTATATATTTG  | AAATCATCCAgTAAACCgCC              |
| 3     | CCTCgTAAATCCTCATCAAA              | TACAAATGGGAAGAAAATACAAGAT  | 4      | CTCCATTAATATATAAATAAGATAC  | AAATCATCCAgTAAACCgCC              |
| 5     | CCTCgTAAATCCTCATCAAA              | TACCATAAACAGTATCCAGAACTTA  | 6      | TCTCTTTGGCTCACAAATGCACGAA  | AAATCATCCAgTAAACCgCC              |
| 7     | CCTCgTAAATCCTCATCAAA              | GCAAATCTCACTAATTTTTCATCTTT | 8      | TTATGTAAAGGGCACTCTAATATAA  | AAATCATCCAgTAAACCgCC              |
| 9     | CCTCgTAAATCCTCATCAAA              | AGACAGTACACATATGTTCAAATCA  | 10     | CTATGTACAGTATCAGAATTTCTTTT | AAATCATCCAgTAAACCgCC              |
| 11    | CCTCgTAAATCCTCATCAAA              | GAGAACATCTGACATACAGCCTGAG  | 12     | TTATTCAACAGTTACTAGAAAAGCT  | AAATCATCCAgTAAACCgCC              |
| 13    | CCTCgTAAATCCTCATCAAA              | AAAATTACAGGAGATCTAGTTATTA  | 14     | TCACAGAGATTGGTCATATACTACT  | AAATCATCCAgTAAACCgCC              |
| 15    | CCTCgTAAATCCTCATCAAA              | TTGCCTTAGGTTTCAGCTAAGCGAG  | 16     | TCAGTGTATCGGAGGTCTTCAGAAA  | AAATCATCCAgTAAACCgCC              |
| 17    | CCTCgTAAATCCTCATCAAA              | TCTTCAAAAACACTTGTGGGACTGG  | 18     | CCCTAAATGCACAGTGTGGGTTTCA  | AAATCATCCAgTAAACCgCC              |
| 19    | CCTCgTAAATCCTCATCAAA              | ATTTTATTTATATTCTTCTTGACACA | 20     | TTTTTTTTTTCATGGAGAATATTTT  | AAATCATCCAgTAAACCgCC              |

#### 4. Split-initiator probes for Figure ESM\_13\_1

Organism: Mouse (*Mus musculus*); Target mRNA: **glutamate decarboxylase 2 (*Gad 65/Gad 2*)**; HCR amplifier: B2-AlexaFluor488

| Odd # | 1st half of Initiator I1 + Spacer | Probe Sequence             | Even # | Probe Sequence            | Spacer + 2nd half of Initiator I1 |
|-------|-----------------------------------|----------------------------|--------|---------------------------|-----------------------------------|
| 1     | CCTCgTAAATCCTCATCAAA              | AGGGTAGAAGAGAGGGCAAGGACAGG | 2      | CACAGCTTGGGACTGGGTGAAAGGG | AAATCATCCAgTAAACCgCC              |
| 3     | CCTCgTAAATCCTCATCAAA              | TCTCTAAGAGCCAATGGAGAGGGCA  | 4      | GGGTGGGACTTAGTTGAGGTTATGT | AAATCATCCAgTAAACCgCC              |
| 5     | CCTCgTAAATCCTCATCAAA              | ACACAGTTGTCAAAGAGATTCTTA   | 6      | CAGAGATGAAGCATTGTGTGCCA   | AAATCATCCAgTAAACCgCC              |
| 7     | CCTCgTAAATCCTCATCAAA              | GCTCCATAATTGGTTTCTCTGGCCT  | 8      | ATACCTGCACTGTCAGCAGCCTGTG | AAATCATCCAgTAAACCgCC              |
| 9     | CCTCgTAAATCCTCATCAAA              | CCTTCTCCAAGACCTGTAGAGTCA   | 10     | CCTTTGTCCATGTTCTGAGGAGCAG | AAATCATCCAgTAAACCgCC              |
| 11    | CCTCgTAAATCCTCATCAAA              | TGTTACTATATTACACCTGTGCAT   | 12     | TGGTTTGATGTTTTGCTTCTTTGT  | AAATCATCCAgTAAACCgCC              |
| 13    | CCTCgTAAATCCTCATCAAA              | AGAAAAGCACGTGCAAGATGATACC  | 14     | CAGTGTTCGATTTAGCACTTGAAA  | AAATCATCCAgTAAACCgCC              |
| 15    | CCTCgTAAATCCTCATCAAA              | TTGCATACACAATAATTAATACA    | 16     | TCAGAAACACCATTTGGCAACAAGA | AAATCATCCAgTAAACCgCC              |
| 17    | CCTCgTAAATCCTCATCAAA              | AGGTTGCCACATTTGTTTTATTTT   | 18     | CATACACAAGTTTATATTTGGTAGC | AAATCATCCAgTAAACCgCC              |
| 19    | CCTCgTAAATCCTCATCAAA              | GAAAACACAGGTAAAATACTTTGAT  | 20     | ATTTACACATTTATTTGGGTTAGA  | AAATCATCCAgTAAACCgCC              |

#### 5. Split-initiator probes for Figures 3a, 3b, 7a, and 7b

Organism: Rat (*Rattus norvegicus*); Target mRNA: **Somatostatin (*Sst*)**; HCR amplifier: B3-AlexaFluor647

| Odd # | 1st half of Initiator I1 + Spacer | Probe Sequence            | Even # | Probe Sequence            | Spacer + 2nd half of Initiator I1 |
|-------|-----------------------------------|---------------------------|--------|---------------------------|-----------------------------------|
| 1     | gTCCCTgCCTCTATATCTTT              | AGCATCTCCCCTGCCTCAGACAGCC | 2      | GCCAGCGCGCACTGGAGACGGCAGG | TTCCACTCAACTTTAACCCg              |
| 3     | gTCCCTgCCTCTATATCTTT              | CAAAGCCAGGACGATGCAGAGCGCG | 4      | GTCCGAGGGCGCCCCGGTGACACCG | TTCCACTCAACTTTAACCCg              |
| 5     | gTCCCTgCCTCTATATCTTT              | TCTGCAGAAACTGACGGAGTCTGGG | 6      | GTTTCCCGGTGGCAGCCGCCAGAGA | TTCCACTCAACTTTAACCCg              |
| 7     | gTCCCTgCCTCTATATCTTT              | GCCAAGAAGTACTTGGCCAGTTCCT | 8      | GTCTGGTTGGGCTCGGACAGCAGTT | TTCCACTCAACTTTAACCCg              |
| 9     | gTCCCTgCCTCTATATCTTT              | CTCAGGCTCCAGGCATCGTTCTCT  | 10     | GTCCTGCTCAGCTGCCTGGGGCAA  | TTCCACTCAACTTTAACCCg              |
| 11    | gTCCCTgCCTCTATATCTTT              | ACCTCTGCAGCTCCAGCCTCATCTC | 12     | GTGCCATGGCTGGGTTGAGTTGGC  | TTCCACTCAACTTTAACCCg              |
| 13    | gTCCCTgCCTCTATATCTTT              | TTGCAGCCAGCTTTCGTTCCCGGG  | 14     | GATGTGAATGTCTTCCAGAAGAAGT | TTCCACTCAACTTTAACCCg              |
| 15    | gTCCCTgCCTCTATATCTTT              | GAGACAACAATATTAAGCTAACAG  | 16     | TGGAGGAGAGGGATCAGAGGTCTGG | TTCCACTCAACTTTAACCCg              |
| 17    | gTCCCTgCCTCTATATCTTT              | GGAGTTAAGGAAGAGATATGGGATT | 18     | CTAGTTGAGCATTGGGGGGGGGGC  | TTCCACTCAACTTTAACCCg              |
| 19    | gTCCCTgCCTCTATATCTTT              | CAGTCTTCAATTTCTAACGCAGGGT | 20     | TTTCACCATAATTTTATTTTGTATT | TTCCACTCAACTTTAACCCg              |

## 6. Split-initiator probes for Figures 4a, 4b, 7e, and 7f

Organism: Rat (*Rattus norvegicus*); Target mRNA: **Parvalbumin (*Pvalb*)**; HCR amplifier: B1-AlexaFluor647

| Odd # | 1st half of Initiator I1 + Spacer | Probe Sequence            | Even # | Probe Sequence            | Spacer + 2nd half of Initiator I1 |
|-------|-----------------------------------|---------------------------|--------|---------------------------|-----------------------------------|
| 1     | gAggAgggCagCAAACggAA              | CTTGATGTCCTCAGCGCTGAGCAAG | 2      | TGCAGCAGTAAAGGCTCCTATCGCC | TAgAAgAgTCTTCCTTTACg              |
| 3     | gAggAgggCagCAAACggAA              | AACACCTTCTTCACATCATCCGCAC | 4      | CCACTTTTGTCTTTGTCCAGAATGT | TAgAAgAgTCTTCCTTTACg              |
| 5     | gAggAgggCagCAAACggAA              | CCCCAGCTCATCTCCTCAATGAAG  | 6      | ATCTGAGGAGAAGCCCTCAGAATG  | TAgAAgAgTCTTCCTTTACg              |
| 7     | gAggAgggCagCAAACggAA              | TTTCCTTAGCAGACAAGTCTCTGGC | 8      | TGTCTCCAGCAGCCATCAGCGTCTT | TAgAAgAgTCTTCCTTTACg              |
| 9     | gAggAgggCagCAAACggAA              | ACCCAATCTTGCCATCCCCGTCCT  | 10     | TCGGCCACCAGAGTGGAGAATTCTT | TAgAAgAgTCTTCCTTTACg              |
| 11    | gAggAgggCagCAAACggAA              | CCAAGCAGTCAGCGCCACTTAGCTT | 12     | GGCATGGGGGTGGAGAGGTGGGAG  | TAgAAgAgTCTTCCTTTACg              |
| 13    | gAggAgggCagCAAACggAA              | AGGGCCGCGAGAAGGGCTGAGATGG | 14     | CATAAACAACTGAACAGAAACCCA  | TAgAAgAgTCTTCCTTTACg              |
| 15    | gAggAgggCagCAAACggAA              | TAAAGGATGGGGGAGTAAAAAATAA | 16     | CAGAAGAGTGGTGCATTGAGGGC   | TAgAAgAgTCTTCCTTTACg              |
| 17    | gAggAgggCagCAAACggAA              | TAAAGGATGGGGGAGTAAAAAATAA | 18     | CAGAAGAGTGGTGCATTGAGGGC   | TAgAAgAgTCTTCCTTTACg              |

## 7. Split-initiator probes for Figures 4c, and 7c

Organism: Rat (*Rattus norvegicus*); Target mRNA: **Tyrosine hydroxylase (*Th*)**; HCR amplifier: B1-AlexaFluor647

| Odd # | 1st half of Initiator I1 + Spacer | Probe Sequence            | Even # | Probe Sequence            | Spacer + 2nd half of Initiator I1 |
|-------|-----------------------------------|---------------------------|--------|---------------------------|-----------------------------------|
| 1     | gAggAgggCagCAAACggAA              | GACAGCAGCCCTGCACCATAAGCCT | 2      | AGGGAGTGCAGGAGCTCTCCGTAGG | TAgAAgAgTCTTCCTTTACg              |
| 3     | gAggAgggCagCAAACggAA              | GGCTCGGACCTCAGGCTCCTCTGAC | 4      | CTGCACAGCTGCTGTGTCTGGGTCA | TAgAAgAgTCTTCCTTTACg              |
| 5     | gAggAgggCagCAAACggAA              | GCTGGTAGGTTTGATCTTGGTAGGG | 6      | TGAAGCTCTCGGACACAAAGTACAC | TAgAAgAgTCTTCCTTTACg              |
| 7     | gAggAgggCagCAAACggAA              | TTCCTGAGCTTGTCTTGGCGTCAT  | 8      | AATGGGCGCTGGATACGAGAGGCAT | TAgAAgAgTCTTCCTTTACg              |
| 9     | gAggAgggCagCAAACggAA              | TGTGTACGGGTCAAACCTCACAGAG | 10     | AGGGCTGTCCAGTACGTCAATGGCC | TAgAAgAgTCTTCCTTTACg              |
| 11    | gAggAgggCagCAAACggAA              | CCTCCAAGGAGCGCTGGATGGTGTG | 12     | CCAGGGTGTGCAGCTCATCTGGAC  | TAgAAgAgTCTTCCTTTACg              |
| 13    | gAggAgggCagCAAACggAA              | TAGCTAATGGCACTCAGTGCCTGGG | 14     | GCACCTGTGGGTGGTACCCTATGCA | TAgAAgAgTCTTCCTTTACg              |
| 15    | gAggAgggCagCAAACggAA              | GGTTGAGAAGCAGTGTGGGAGGAT  | 16     | CCTGGAGTGCATGCAGTAGTAAGAC | TAgAAgAgTCTTCCTTTACg              |
| 17    | gAggAgggCagCAAACggAA              | GAGGGCAGGAGGAATGCAGGACCAC | 18     | AGAATAATCAGGGTAGTATAGAGCA | TAgAAgAgTCTTCCTTTACg              |
| 19    | gAggAgggCagCAAACggAA              | TAGATTCTTTCCTTCCTTTATTGAG | 20     | GGAGCTGTCTGGCCTCATACAGAG  | TAgAAgAgTCTTCCTTTACg              |

### 8. Split-initiator probes for Figures 4d, 6d, ESM\_13\_6c, and ESM\_13\_6d

Organism: Rat (*Rattus norvegicus*); Target mRNA: **Dopamine hydroxylase (*Dbh*)**; HCR amplifier: B1-AlexaFluor647

| Odd # | 1st half of Initiator I1 + Spacer | Probe Sequence            | Even # | Probe Sequence            | Spacer + 2nd half of Initiator I1 |
|-------|-----------------------------------|---------------------------|--------|---------------------------|-----------------------------------|
| 1     | gAggAgggCAgCAAACggAA              | GGCACTCTGCAGAGCTCCAGCTCT  | 2      | GTATTTCTGCAGGAAGCCATCATCC | TAgAAgAgTCTTCCTTTACg              |
| 3     | gAggAgggCAgCAAACggAA              | TGCCGAACCGGTTTACTATGTGGAA | 4      | CCTGAGGGCAGGTGCAGACCTCCTC | TAgAAgAgTCTTCCTTTACg              |
| 5     | gAggAgggCAgCAAACggAA              | ATAGTTATACAAAGCCTTGAGCATA | 6      | CTTGTTACAGTGCACAGAGATAGGG | TAgAAgAgTCTTCCTTTACg              |
| 7     | gAggAgggCAgCAAACggAA              | TACCCGGGAAGCGGACGGCAGAGGT | 8      | TCTTAGGCAGAGGCTGCAGGTTCCA | TAgAAgAgTCTTCCTTTACg              |
| 9     | gAggAgggCAgCAAACggAA              | AAAACGAGGAGAGGCTGAAGAACAA | 10     | CAGAGCTGGAGTGAGCCAGTAGGG  | TAgAAgAgTCTTCCTTTACg              |
| 11    | gAggAgggCAgCAAACggAA              | GGTGTCTCCAAGGTGATACCCCTC  | 12     | TCAGACCTCATGGATGCAGCCGTG  | TAgAAgAgTCTTCCTTTACg              |
| 13    | gAggAgggCAgCAAACggAA              | TGATGTCCAGAGCTGCTCTGTCCAG | 14     | GTTGTCCCTCTGTGGAGCCAGCAGT | TAgAAgAgTCTTCCTTTACg              |
| 15    | gAggAgggCAgCAAACggAA              | AGTTGAATCTGGACTCCACATTGA  | 16     | GTTCTGGAGGCAAGGGAGGTCCTGT | TAgAAgAgTCTTCCTTTACg              |
| 17    | gAggAgggCAgCAAACggAA              | AGTCTGCACCCAGCCTGGTAAGGCT | 18     | ACAGGGTCAGGACTGTGAGGCTTGG | TAgAAgAgTCTTCCTTTACg              |
| 19    | gAggAgggCAgCAAACggAA              | CAACACAAGTTACCACCAGAGGCCA | 20     | TTTAAACAGTGTTGCATGGCATAc  | TAgAAgAgTCTTCCTTTACg              |

### 9. Split-initiator probes for Figure 6b

Organism: Rat (*Rattus norvegicus*); Target mRNA: **Dopamine hydroxylase (*Dbh*)**; HCR amplifier: B2-AlexaFluor488

| Odd # | 1st half of Initiator I1 + Spacer | Probe Sequence            | Even # | Probe Sequence            | Spacer + 2nd half of Initiator I1 |
|-------|-----------------------------------|---------------------------|--------|---------------------------|-----------------------------------|
| 1     | CCTCgTAAATCCTCATCAAA              | GGCACTCTGCAGAGCTCCAGCTCT  | 2      | GTATTTCTGCAGGAAGCCATCATCC | AAATCATCCAgTAAACCgCC              |
| 3     | CCTCgTAAATCCTCATCAAA              | TGCCGAACCGGTTTACTATGTGGAA | 4      | CCTGAGGGCAGGTGCAGACCTCCTC | AAATCATCCAgTAAACCgCC              |
| 5     | CCTCgTAAATCCTCATCAAA              | ATAGTTATACAAAGCCTTGAGCATA | 6      | CTTGTTACAGTGCACAGAGATAGGG | AAATCATCCAgTAAACCgCC              |
| 7     | CCTCgTAAATCCTCATCAAA              | TACCCGGGAAGCGGACGGCAGAGGT | 8      | TCTTAGGCAGAGGCTGCAGGTTCCA | AAATCATCCAgTAAACCgCC              |
| 9     | CCTCgTAAATCCTCATCAAA              | AAAACGAGGAGAGGCTGAAGAACAA | 10     | CAGAGCTGGAGTGAGCCAGTAGGG  | AAATCATCCAgTAAACCgCC              |
| 11    | CCTCgTAAATCCTCATCAAA              | GGTGTCTCCAAGGTGATACCCCTC  | 12     | TCAGACCTCATGGATGCAGCCGTG  | AAATCATCCAgTAAACCgCC              |
| 13    | CCTCgTAAATCCTCATCAAA              | TGATGTCCAGAGCTGCTCTGTCCAG | 14     | GTTGTCCCTCTGTGGAGCCAGCAGT | AAATCATCCAgTAAACCgCC              |
| 15    | CCTCgTAAATCCTCATCAAA              | AGTTGAATCTGGACTCCACATTGA  | 16     | GTTCTGGAGGCAAGGGAGGTCCTGT | AAATCATCCAgTAAACCgCC              |
| 17    | CCTCgTAAATCCTCATCAAA              | AGTCTGCACCCAGCCTGGTAAGGCT | 18     | ACAGGGTCAGGACTGTGAGGCTTGG | AAATCATCCAgTAAACCgCC              |
| 19    | CCTCgTAAATCCTCATCAAA              | CAACACAAGTTACCACCAGAGGCCA | 20     | TTTAAACAGTGTTGCATGGCATAc  | AAATCATCCAgTAAACCgCC              |

## 10. Split-initiator probes for Figure 6c

Organism: Rat (*Rattus norvegicus*); Target mRNA: **Dopamine hydroxylase (*Dbh*)**; HCR amplifier: B3-AlexaFluor594

| Odd # | 1st half of Initiator I1 + Spacer | Probe Sequence            | Even # | Probe Sequence             | Spacer + 2nd half of Initiator I1 |
|-------|-----------------------------------|---------------------------|--------|----------------------------|-----------------------------------|
| 1     | gTCCCTgCCTCTATATCTTT              | GGCACTCTTGAGAGCTCCAGCTCT  | 2      | GTATTTCTGCAGGAAGCCATCATCC  | TTCCAACACTTTAACCg                 |
| 3     | gTCCCTgCCTCTATATCTTT              | TGCCGAACCGTTTACTATGTGGAA  | 4      | CCTGAGGGCAGGTGCAGACCTCCTC  | TTCCAACACTTTAACCg                 |
| 5     | gTCCCTgCCTCTATATCTTT              | ATAGTTATACAAAGCCTTGAGCATA | 6      | CTTGTTACAGTGCACAGAGATAGGG  | TTCCAACACTTTAACCg                 |
| 7     | gTCCCTgCCTCTATATCTTT              | TACCCGGGAAGCGGACGGCAGAGGT | 8      | TCTTAGGCAGAGGCTGCAGGTTCCA  | TTCCAACACTTTAACCg                 |
| 9     | gTCCCTgCCTCTATATCTTT              | AAAACGAGGAGAGGCTGAAGAACAA | 10     | CAGAGCTGGAGTGAGCCAGTAGGG   | TTCCAACACTTTAACCg                 |
| 11    | gTCCCTgCCTCTATATCTTT              | GGTGTCTCCAAGGTGATACCCCTC  | 12     | TCAGACCTCATGGATGCAGCCGTG   | TTCCAACACTTTAACCg                 |
| 13    | gTCCCTgCCTCTATATCTTT              | TGATGTCCAGAGCTGCTCTGCCAG  | 14     | GTTGTCCCTCTGTGGAGCCAGCAGT  | TTCCAACACTTTAACCg                 |
| 15    | gTCCCTgCCTCTATATCTTT              | AGTTGAATCTGGACTCCACATTGA  | 16     | GTTCTGGAGGCAAGGGAGGTCCTGT  | TTCCAACACTTTAACCg                 |
| 17    | gTCCCTgCCTCTATATCTTT              | AGTCTGCACCCAGCCTGGTAAGGCT | 18     | ACAGGGTCAGGACTGTGAGGCTTGG  | TTCCAACACTTTAACCg                 |
| 19    | gTCCCTgCCTCTATATCTTT              | CAACACAAGTTACCACCAGAGGCCA | 20     | TTTAAACAGTGTTGTCATGGCATAAC | TTCCAACACTTTAACCg                 |

## 11. Split-initiator probes for Figures 7d

Organism: Rat (*Rattus norvegicus*); Target mRNA: **solute carrier family 6 member 3 (*Slc6a3/Dat*)**; HCR amplifier: B3-AlexaFluor594

| Odd # | 1st half of Initiator I1 + Spacer | Probe Sequence            | Even # | Probe Sequence            | Spacer + 2nd half of Initiator I1 |
|-------|-----------------------------------|---------------------------|--------|---------------------------|-----------------------------------|
| 1     | gTCCCTgCCTCTATATCTTT              | GCTGGAACATCATCGACGAGCCAGT | 2      | TGAAGAGCTCTCGATGCCGATGTAG | TTCCAACACTTTAACCg                 |
| 3     | gTCCCTgCCTCTATATCTTT              | AAAGTAGCCAGGACAATGCCAAGAG | 4      | TTGGTGACGCAGAAGAGAGACAGCA | TTCCAACACTTTAACCg                 |
| 5     | gTCCCTgCCTCTATATCTTT              | CAGTGTGAAGACGTAGATGCCACCG | 6      | AGATGTGCCAGCTGCAAAGTGGTCC | TTCCAACACTTTAACCg                 |
| 7     | gTCCCTgCCTCTATATCTTT              | CTTCAATGAGCACGCCAAAGAGGAT | 8      | CGCCGTAGAACCAGGCCACCCAAT  | TTCCAACACTTTAACCg                 |
| 9     | gTCCCTgCCTCTATATCTTT              | TTGATGTCATCACTGAATTGCTGGA | 10     | AGGTTGGGTGCTGCCCCTGCATTT  | TTCCAACACTTTAACCg                 |
| 11    | gTCCCTgCCTCTATATCTTT              | CCCAGGGCATTGGCCAGTCTGGGA  | 12     | GCCATGGAGGATGTGGCGATGATCC | TTCCAACACTTTAACCg                 |
| 13    | gTCCCTgCCTCTATATCTTT              | GTAGTGCATATAAATGGGCACCATG | 14     | GAAGGACCCCGGCAGGCTGCAGAAC | TTCCAACACTTTAACCg                 |
| 15    | gTCCCTgCCTCTATATCTTT              | TGATGGCATAGGCCAGTTTCTCCCG | 16     | CCACTAGCTGATGGTCTTTCTCAGG | TTCCAACACTTTAACCg                 |
| 17    | gTCCCTgCCTCTATATCTTT              | GTGAATTGGCGCACCTCCCCTCTGT | 18     | CTTTACAGCAACAGCCAGTGACGCA | TTCCAACACTTTAACCg                 |
| 19    | gTCCCTgCCTCTATATCTTT              | CCCAGCTGGCAGCTGTCTCCTTCCA | 20     | ACACGCCTGATTCTTCATGTGAGGT | TTCCAACACTTTAACCg                 |

## 12. Split-initiator probes for Figures 4e

Organism: Human (*Homo sapiens*); Target mRNA: **calbindin-1 (CALB)**; HCR amplifier: B3-AlexaFluor647

| Odd # | 1st half of Initiator I1 + Spacer | Probe Sequence              | Even # | Probe Sequence             | Spacer + 2nd half of Initiator I1 |
|-------|-----------------------------------|-----------------------------|--------|----------------------------|-----------------------------------|
| 1     | gTCCCTgCCTCTATATCTTT              | TGAGTATTTTAGATGGAAAAGCACA   | 2      | ATAAAGCCACAATTA ACTATATTTT | TTCCACTCAACTTTA ACCCg             |
| 3     | gTCCCTgCCTCTATATCTTT              | AATCTGTAATGAGACTGTAACTTC    | 4      | GTAGACATGCTGTTGATTGGTAAAC  | TTCCACTCAACTTTA ACCCg             |
| 5     | gTCCCTgCCTCTATATCTTT              | CGATAGTTTTGTATGGATCCAAGCA   | 6      | CCCTTCCCTTGT CACATCAACTTGA | TTCCACTCAACTTTA ACCCg             |
| 7     | gTCCCTgCCTCTATATCTTT              | ACAGATTTATGTGTCATCTGGTGCT   | 8      | TTGTTGGAAATACAGGCATAGAATC  | TTCCACTCAACTTTA ACCCg             |
| 9     | gTCCCTgCCTCTATATCTTT              | TAGGTCATATTCTCTGACAGTAAGT   | 10     | ACATGAAAACAGTTTAGAAAATGGA  | TTCCACTCAACTTTA ACCCg             |
| 11    | gTCCCTgCCTCTATATCTTT              | GCAGTTGACTAGAATAATTTGCAAC   | 12     | AGATTACACAGAGTATGACATAAAA  | TTCCACTCAACTTTA ACCCg             |
| 13    | gTCCCTgCCTCTATATCTTT              | TATGCAGTATATTAATTTAATCAG    | 14     | AGGAAGTATGCAAAC TAGACACCAG | TTCCACTCAACTTTA ACCCg             |
| 15    | gTCCCTgCCTCTATATCTTT              | ACAGTTCTACATAGAAAGAAAATCC   | 16     | GGCAGCAGATACCCTTGGTGGAAT   | TTCCACTCAACTTTA ACCCg             |
| 17    | gTCCCTgCCTCTATATCTTT              | ATAGCTAGAAAAAATATTTTCAGA    | 18     | AATTATGTAGTAAAAAATAGAGTTG  | TTCCACTCAACTTTA ACCCg             |
| 19    | gTCCCTgCCTCTATATCTTT              | TGCTATGAATTTTACATTA AAAATTT | 20     | TGATGATATAACATTCAATAATCAG  | TTCCACTCAACTTTA ACCCg             |

## 13. Split-initiator probes for Figures 4f, and ESM\_13\_4

Organism: Human (*Homo sapiens*); Target mRNA: **parvalbumin (PVALB)**; HCR amplifier: B2-AlexaFluor647

| Odd # | 1st half of Initiator I1 + Spacer | Probe Sequence            | Even # | Probe Sequence             | Spacer + 2nd half of Initiator I1 |
|-------|-----------------------------------|---------------------------|--------|----------------------------|-----------------------------------|
| 1     | CCTCgTAAATCCTCATCAAA              | TCCTGCAACTCGGGTGGGGTGGAG  | 2      | CAGCGTTCAGCAAGTCTGTCATCGA  | AAATCATCCAgTAAACCgCC              |
| 3     | CCTCgTAAATCCTCATCAAA              | GCTCCCACCGCCTTCTTGATGCCT  | 4      | TGGTCGAAGGAGTCGGTAGCGCTAA  | AAATCATCCAgTAAACCgCC              |
| 5     | CCTCgTAAATCCTCATCAAA              | GCCGACCATTTGGAAGAACTTTTTG | 6      | CACATCATCCGCACTTTTTTCTTC   | AAATCATCCAgTAAACCgCC              |
| 7     | CCTCgTAAATCCTCATCAAA              | TGTCCAGCATGTGAAACACCTTCTT | 8      | CCTCCTCGATGAAGCACTTTTGTGTC | AAATCATCCAgTAAACCgCC              |
| 9     | CCTCgTAAATCCTCATCAAA              | CCTTTTAGGATGAATCCCAGCTCAT | 10     | GACAGGTCTCTGGCATCTGGGGAGA  | AAATCATCCAgTAAACCgCC              |
| 11    | CCTCgTAAATCCTCATCAAA              | CATCAGCATCTTGGTTTCTTTAGCA | 12     | GCCGTCCCCTCTTTGTCTCCAGCA   | AAATCATCCAgTAAACCgCC              |
| 13    | CCTCgTAAATCCTCATCAAA              | TGGAGAATTCGTCAACCCCAATTTT | 14     | GTGCTTCTTAGCTTT CAGCCACCAG | AAATCATCCAgTAAACCgCC              |
| 15    | CCTCgTAAATCCTCATCAAA              | AGAGGTGGAAGACCAGGGGCAGTCA | 16     | GGGGCCGAGATTGGGTGTT CAGGGC | AAATCATCCAgTAAACCgCC              |
| 17    | CCTCgTAAATCCTCATCAAA              | ACAGAAATGCAGGAGGGTGGCGAGA | 18     | GAGTAAAAAATAACATAAACGAACT  | AAATCATCCAgTAAACCgCC              |
|       | CCTCgTAAATCCTCATCAAA              | CATTAGAGGGCCACAGGGGATGGGG | 20     | CTCCAGCATTTTCCAGAAGAATGGT  | AAATCATCCAgTAAACCgCC              |
